# Supplementary material for: Three sandwich-type zinc(ii)–lanthanide(iii) clusters: structures, luminescence and magnetic properties
Source: Royal Society of Chemistry journal article supplement (doi:10.1039/c7ra01469d), 2017-01-01
Supplement: c7ra01469d1.pdf [file c7ra01469d1.pdf]

## Supporting Information

### Three Sandwich-type Zinc(II)-Lanthanide(III) Clusters: Structures, Luminescence and Magnetic properties

Xue-Qin Song,<sup>\*a</sup> Pan-Pan Liu,<sup>a</sup> Cai-yun Wang<sup>a</sup>, Yuan-An Liu,<sup>a</sup> Wei-Sheng Liu,<sup>b</sup> and Mo Zhang<sup>a</sup>

**Table S1.** Crystal data and structure refinement parameters for compound  $\text{Zn}^{\text{II}}_2\text{Eu}^{\text{III}}_4$ ,  $\text{Zn}^{\text{II}}_2\text{Tb}^{\text{III}}_4$  and  $\text{Zn}^{\text{II}}_2\text{Dy}^{\text{III}}_4$ .

|                                        | $\text{Zn}^{\text{II}}_2\text{Eu}^{\text{III}}_4$                                                            | $\text{Zn}^{\text{II}}_2\text{Tb}^{\text{III}}_4$                                                            | $\text{Zn}^{\text{II}}_2\text{Dy}^{\text{III}}_4$                                                        |
|----------------------------------------|--------------------------------------------------------------------------------------------------------------|--------------------------------------------------------------------------------------------------------------|----------------------------------------------------------------------------------------------------------|
| Empirical formula                      | $\text{Zn}_2\text{Eu}_4\text{C}_{94}\text{H}_{114}\text{N}_{10}\text{O}_{42}$                                | $\text{Zn}_2\text{Tb}_4\text{C}_{94}\text{H}_{114}\text{N}_{10}\text{O}_{42}$                                | $\text{Zn}_2\text{Dy}_4\text{C}_{94}\text{H}_{114}\text{N}_{10}\text{O}_{42}$                            |
| Formula weight                         | 2794.62                                                                                                      | 2822.46                                                                                                      | 2836.74                                                                                                  |
| Temperature                            | 293(2)                                                                                                       | 293(2)                                                                                                       | 293(2)                                                                                                   |
| Crystal system, space group            | Monoclinic, $P2_1/n$                                                                                         | Monoclinic, $P2_1/n$                                                                                         | Monoclinic, $P2_1/n$                                                                                     |
| Unit cell dimensions                   | $a = 16.6693(5)\text{Å}$<br>$b = 17.1718(5)\text{Å}$<br>$c = 20.9256(7)\text{Å}$<br>$\beta = 102.3553^\circ$ | $a = 16.5858(3)\text{Å}$<br>$b = 17.2083(3)\text{Å}$<br>$c = 21.1240(4)\text{Å}$<br>$\beta = 102.2803^\circ$ | $a = 16.513(3)\text{Å}$<br>$b = 17.241(3)\text{Å}$<br>$c = 23.807(8)\text{Å}$<br>$\beta = 120.282^\circ$ |
| Volume ( $\text{Å}^3$ ), Z             | 5851.1(13), 2                                                                                                | 5891.11(91), 2                                                                                               | 5853(3), 2                                                                                               |
| Absorption coefficient                 | 2.599 $\text{mm}^{-1}$                                                                                       | 2.853 $\text{mm}^{-1}$                                                                                       | 3.008 $\text{mm}^{-1}$                                                                                   |
| F(000)                                 | 2792                                                                                                         | 2808                                                                                                         | 2816                                                                                                     |
| $\theta$ range for data collection     | 3.69 to 26.01                                                                                                | 3.47 to 25.50                                                                                                | 3.45 to 25.50                                                                                            |
| Limiting indices                       | $-20 \leq h \leq 16$<br>$-21 \leq k \leq 19$<br>$-25 \leq l \leq 22$                                         | $-9 \leq h \leq 20$<br>$-20 \leq k \leq 12$<br>$-25 \leq l \leq 25$                                          | $-19 \leq h \leq 20$<br>$-20 \leq k \leq 19$<br>$-25 \leq l \leq 28$                                     |
| $R_{\text{int}}$                       | 0.0523                                                                                                       | 0.0577                                                                                                       | 0.0682                                                                                                   |
| Reflections collected unique           | 21584/11508                                                                                                  | 21520/10920                                                                                                  | 25663/10859                                                                                              |
| Completeness                           | 99.7 %                                                                                                       | 99.8 %                                                                                                       | 99.8 %                                                                                                   |
| Absorption correction                  | Multi-Scan                                                                                                   | Multi-Scan                                                                                                   | Multi-Scan                                                                                               |
| Data/restraints/parameters             | 11508 / 828 / 695                                                                                            | 10920/861/698                                                                                                | 10859/86/697                                                                                             |
| Goodness-of-fit on $F^2$               | 1.040                                                                                                        | 1.05                                                                                                         | 1.048                                                                                                    |
| Final R indices [ $ I > 2\sigma(I) $ ] | $R_1 = 0.0571$ , $wR_2 = 0.2349$                                                                             | $R_1 = 0.0577$ , $wR_2 = 0.1685$                                                                             | $R_1 = 0.0682$ , $wR_2 = 0.1524$                                                                         |
| R indices (all data)                   | $R_1 = 0.1419$ , $wR_2 = 0.1711$                                                                             | $R_1 = 0.1480$ , $wR_2 = 0.1711$                                                                             | $R_1 = 0.0873$ , $wR_2 = 0.1623$                                                                         |
| Largest diff. peak and hole            | 2.231 and $-1.260$ ( $\text{e}\cdot\text{Å}^{-3}$ )                                                          | 2.368 and $-1.366$ ( $\text{e}\cdot\text{Å}^{-3}$ )                                                          | 3.286 and $-4.505$ ( $\text{e}\cdot\text{Å}^{-3}$ )                                                      |

**Table S2.** Important bond lengths for compound  $\text{Zn}^{\text{II}}\text{Eu}^{\text{III}}_4$ ,  $\text{Zn}^{\text{II}}\text{Tb}^{\text{III}}_4$  and  $\text{Zn}^{\text{II}}\text{Dy}^{\text{III}}_4$ .

| $[\text{Zn}_2\text{Eu}_4(\text{HL})_4(\text{o-Vanilline})_2(\text{OH})_4]2\text{NO}_3 \cdot 4\text{CH}_3\text{OH}$ ( $\text{Zn}^{\text{II}}\text{Eu}^{\text{III}}_4$ ) |          |         |          |         |          |         |          |         |          |
|------------------------------------------------------------------------------------------------------------------------------------------------------------------------|----------|---------|----------|---------|----------|---------|----------|---------|----------|
| Eu1-O15                                                                                                                                                                | 2.345(5) | Eu1-O14 | 2.358(5) | Eu1-O3  | 2.375(6) | Eu1-O2  | 2.376(6) | Eu1-O15 | 2.384(5) |
| Eu1-O11                                                                                                                                                                | 2.399(6) | Eu1-O16 | 2.416(6) | Eu1-O12 | 2.439(5) | Eu2-O7  | 2.242(6) | Eu2-O15 | 2.378(5) |
| Eu2-O8                                                                                                                                                                 | 2.382(6) | Eu2-O9  | 2.396(6) | Eu2-O12 | 2.447(5) | Eu2-O14 | 2.496(5) | Eu2-O2  | 2.496(5) |
| Eu2-O13                                                                                                                                                                | 2.655(6) | Zn1-O14 | 2.002(6) | Zn1-O4  | 2.072(6) | Zn1-N4  | 2.074(7) | Zn1-N2  | 2.091(7) |
| Zn1-O9                                                                                                                                                                 | 2.100(6) |         |          |         |          |         |          |         |          |
| $[\text{Zn}_2\text{Tb}_4(\text{HL})_4(\text{o-Vanilline})_2(\text{OH})_4]2\text{NO}_3 \cdot 4\text{CH}_3\text{OH}$ ( $\text{Zn}^{\text{II}}\text{Tb}^{\text{III}}_4$ ) |          |         |          |         |          |         |          |         |          |
| Tb-O4                                                                                                                                                                  | 2.211(6) | Tb-O14  | 2.352(6) | Tb-O2   | 2.360(6) | Tb-O3   | 2.362(6) | Tb-O11  | 2.408(6) |
| Tb-O7                                                                                                                                                                  | 2.467(6) | Tb-O16  | 2.485(6) | Tb-O12  | 2.650(6) | Tb2-O14 | 2.301(6) | Tb2-O16 | 2.327(6) |
| Tb2-O8                                                                                                                                                                 | 2.341(6) | Tb2-O7  | 2.347(6) | Tb2-O13 | 2.371(6) | Tb2-O14 | 2.376(5) | Tb2-O15 | 2.392(6) |
| Tb2-O11                                                                                                                                                                | 2.421(6) | Zn-O16  | 2.001(6) | Zn1-N1  | 2.071(8) | Zn-O9   | 2.072(6) | Zn-N4   | 2.098(8) |
| Zn1-O2                                                                                                                                                                 | 2.109(6) |         |          |         |          |         |          |         |          |
| $[\text{Zn}_2\text{Dy}_4(\text{HL})_4(\text{o-Vanilline})_2(\text{OH})_4]2\text{NO}_3 \cdot 4\text{CH}_3\text{OH}$ ( $\text{Zn}^{\text{II}}\text{Dy}^{\text{III}}_4$ ) |          |         |          |         |          |         |          |         |          |
| Dy-O11                                                                                                                                                                 | 2.301(6) | Dy-O15  | 2.322(6) | Dy1-O7  | 2.343(6) | Dy-O8   | 2.352(6) | Dy-O11  | 2.353(6) |
| Dy-O13                                                                                                                                                                 | 2.354(6) | Dy1-O16 | 2.377(6) | Dy1-O12 | 2.422(6) | Dy2-O2  | 2.189(7) | Dy2-O1  | 2.333(7) |
| Dy2-O11                                                                                                                                                                | 2.345(6) | Dy2-O4  | 2.359(6) | Dy2-O12 | 2.385(6) | Dy2-O15 | 2.458(6) | Dy2-O7  | 2.460(7) |
| Dy2-O14                                                                                                                                                                | 2.645(6) | Zn1-O15 | 2.004(6) | Zn1-N2  | 2.058(9) | Zn-N4   | 2.071(8) | Zn-O9   | 2.084(7) |
| Zn1-O4                                                                                                                                                                 | 2.101(7) |         |          |         |          |         |          |         |          |

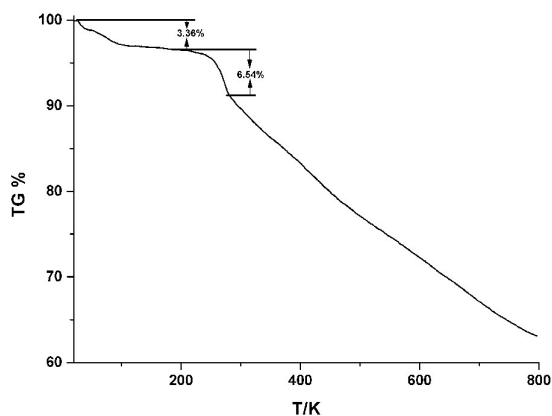**Figure S1.** TG curves for  $\text{Zn}^{\text{II}}\text{Dy}^{\text{III}}_4$ .

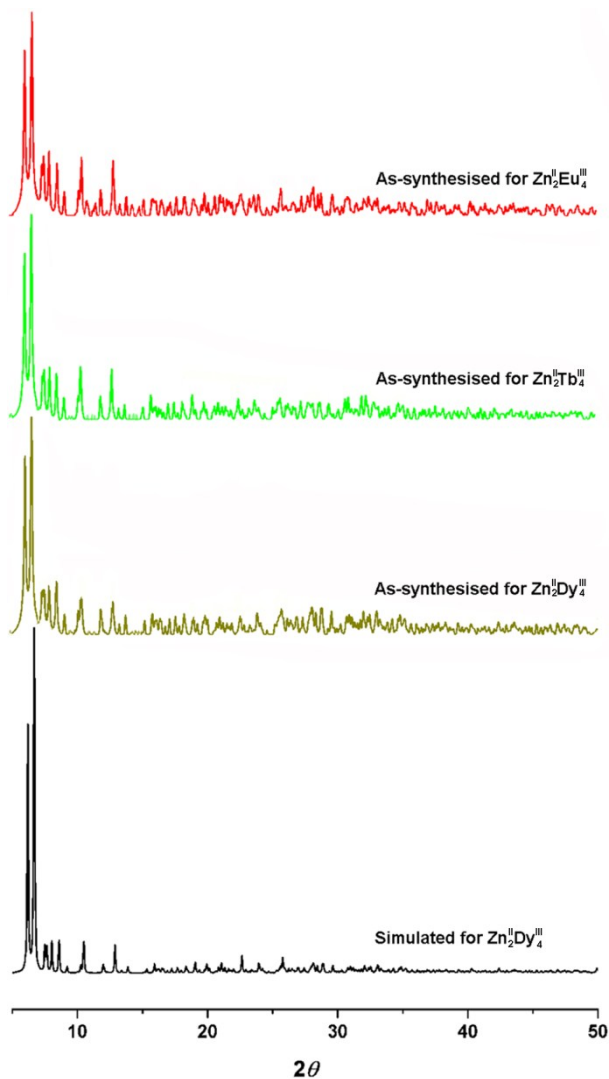

**Figure S2.** Comparing the simulated PXRD (black) and experimental patterns of compounds  $\text{Zn}^{\text{II}}\text{Eu}^{\text{III}}_4$ ,  $\text{Zn}^{\text{II}}\text{Tb}^{\text{III}}_4$  and  $\text{Zn}^{\text{II}}\text{Dy}^{\text{III}}_4$ .

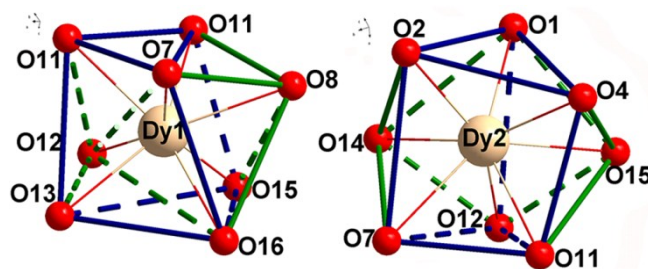

**Figure S3** Coordination polyhedron of  $\text{Dy}^{\text{III}}$  in  $\text{Zn}^{\text{II}}\text{Dy}^{\text{III}}_4$ .

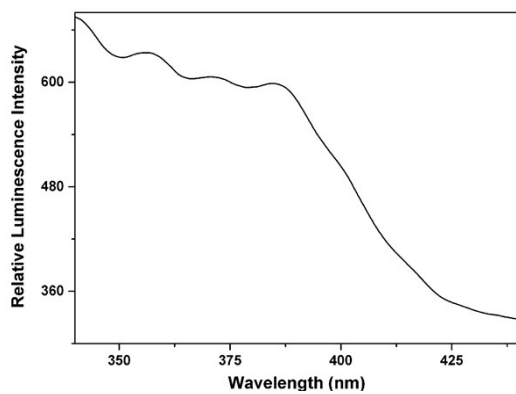

**Figure S4** Excitation spectra of  $\text{Zn}^{\text{II}}_2\text{Eu}^{\text{III}}_4$  at room temperature.

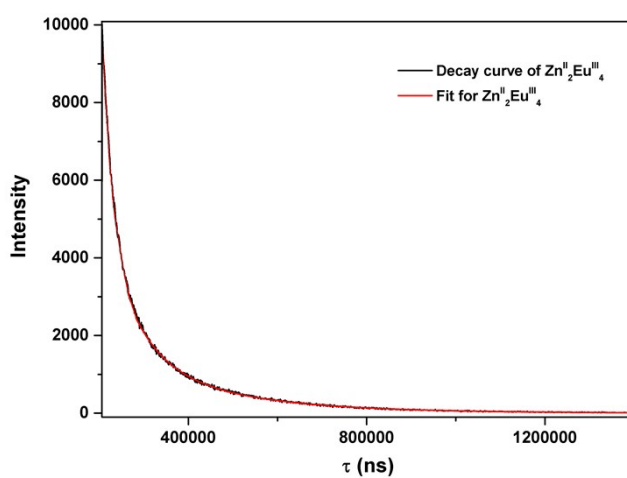

**Figure S5** Emission decay curves of  $\text{Zn}^{\text{II}}_2\text{Eu}^{\text{III}}_4$ .

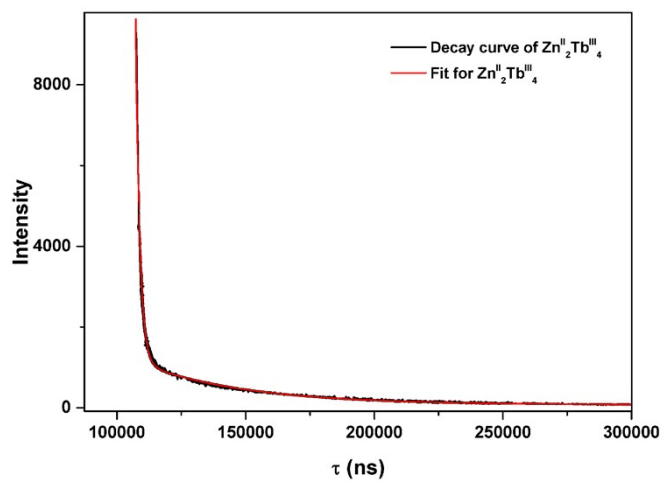

**Figure S6** Emission decay curves of  $\text{Zn}^{\text{II}}_2\text{Tb}^{\text{III}}_4$ .

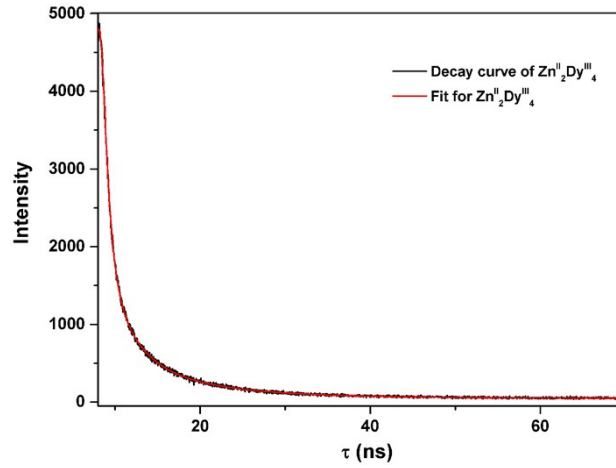

**Figure S7** Emission decay curves of  $\text{Zn}^{\text{II}}_2\text{Dy}^{\text{III}}_4$ .

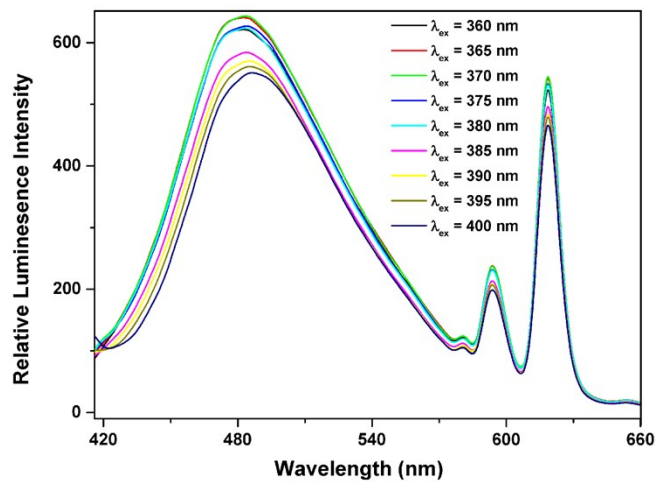

**Figure S8** Emission spectra of different wavelength excitation for  $\text{Zn}^{\text{II}}_2\text{Eu}^{\text{III}}_4$ .

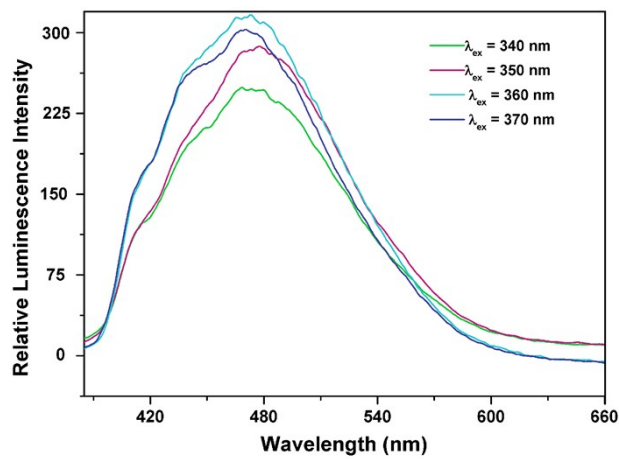

**Figure S9** Emission spectra of different wavelength excitation for  $\text{Zn}^{\text{II}}_2\text{Tb}^{\text{III}}_4$ .

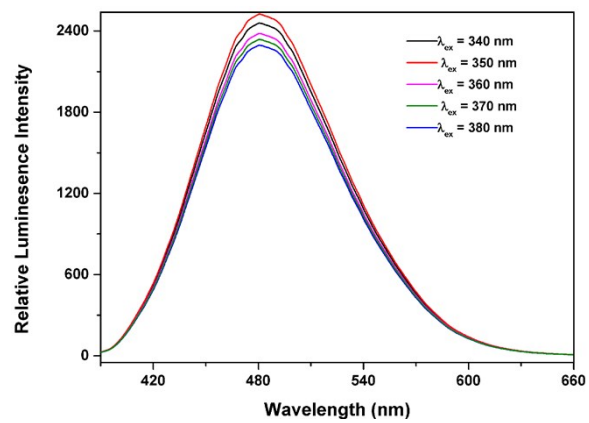

**Figure S10** Emission spectra of different wavelength excitation for Zn<sup>II</sup><sub>2</sub>Dy<sup>III</sup><sub>4</sub>.
